# Supplementary material for: Electrocoagulation-Adsorption to Remove Anionic and Cationic Dyes from Aqueous Solution by PV-Energy
Source: Hindawi journal article supplement (doi:10.1155/2017/5184590), 2017-01-01
Supplement: f1 [file 5184590.f1.docx]

**
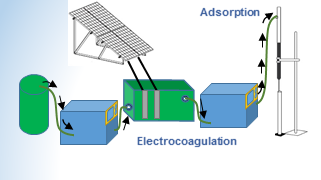
**

**Graphical abstract**

The scheme represents the continuous anionic and cationic dyes removal in aqueous solution by PV-energy operated electrocoagulation and adsorption processes.
